# Supplementary material for: Characterization of the (Poly)Phenolic Fraction of Fig Peel: Comparison among Twelve Cultivars Harvested in Tuscany
Source: MDPI journal article supplement (doi:10.3390/plants11223073), 2022-11-13

# Characterization of the (Poly)Phenolic Fraction of Fig Peel: Comparison among Twelve Cultivars Harvested in Tuscany

Luca Calani <sup>1</sup>, Letizia Bresciani <sup>1,\*</sup>, Margherita Rodolfi <sup>1</sup>, Daniele Del Rio <sup>1</sup>, Raffaella Petruccelli <sup>2</sup>, Cecilia Faraloni <sup>2</sup> and Tommaso Ganino <sup>1,2,\*</sup>

<sup>1</sup> Department of Food and Drug, University of Parma, Parco Area delle Scienze 27/A, 43124 Parma, Italy

<sup>2</sup> Institute of BioEconomy (IBE-CNR), via Madonna del Piano 10, 50019 Sesto Fiorentino (FI), Italy

\* Correspondence: letizia.bresciani@unipr.it (L.B.); tommaso.ganino@unipr.it (T.G.); Tel.: +39-0521-903906 (L.B.); +39-0521-905597 (T.G.)

## Supplementary Material

**Table S1.** Chromatographic and mass spectrometric characteristics of (poly)phenols identified in fig peels and whole dried fig.

| Compound                           | RT<br>(min) | [M-H] <sup>-</sup><br>(m/z) | MS <sup>2</sup> ions<br>(m/z) | MS <sup>3</sup> ions<br>(m/z) | Standard compound used<br>for quantification |
|------------------------------------|-------------|-----------------------------|-------------------------------|-------------------------------|----------------------------------------------|
| <b>Phenolic acids</b>              |             |                             |                               |                               |                                              |
| Vanillic acid derivative I         | 7.46        | 167                         | 152,167                       |                               |                                              |
| Vanillic acid derivative II        | 8.96        | 167                         | 123,152                       |                               |                                              |
| Dihydroxybenzoic acid-O-pentoside  | 3.21        | 285                         | 153,152,165,151,163,225,109   | (153)109,135                  |                                              |
| Hydroxybenzoic acid-O-hexoside     | 4.07        | 299                         | 137                           | (137)93                       |                                              |
| Dihydroxybenzoic acid-O-hexoside   | 1.75        | 315                         | 153,152,165,109               | (153)109,153,108              |                                              |
| Caffeic acid-O-hexoside            | 3.86        | 341                         | 179,297,113,143,173           |                               |                                              |
| Homovanillic acid-O-hexoside       | 2.97        | 343                         | 181,137,163                   |                               |                                              |
| 3-Caffeoylquinic acid              | 2.70        | 353                         | 191,179                       | (191)127,173,85,93            | 3-Caffeoylquinic acid                        |
| 5-Caffeoylquinic acid              | 6.24        | 353                         | 191,179                       | (191)127,173,85,93            | 5-Caffeoylquinic acid                        |
| Caffeoylquinic acid isomer         | 7.27        | 353                         | 191,179                       | (191)127,173,85,93            | 5-Caffeoylquinic acid                        |
| Ferulic acid-O-hexoside**          | 6.14        | 401                         | 355,193                       | (355)193                      |                                              |
| Sinapic acid-O-hexoside**          | 6.93        | 431                         | 385,223,269                   | (385)223                      |                                              |
| <b>Flavan-3-ols</b>                |             |                             |                               |                               |                                              |
| (+)-Catechin                       | 4.25        | 289                         | 245,205,179,231               |                               | (+)-Catechin                                 |
| (-)-Epicatechin                    | 7.19        | 289                         | 245,205,179,231               |                               | (+)-Catechin                                 |
| Procyanidin dimer B-type           | 3.57        | 577                         | 425,451,407,289,287,467       |                               | Procyanidin B2                               |
| <b>Flavanones</b>                  |             |                             |                               |                               |                                              |
| Pinocembrin                        | 12.39       | 255                         | 213,211,151,187               |                               |                                              |
| Naringenin                         | 12.17       | 271                         | 151,177                       |                               |                                              |
| Naringenin-like                    | 12.33       | 271                         | 151,177                       |                               |                                              |
| Naringenin-O-hexoside              | 10.74       | 433                         | 271,295                       | (271)151,177,107              |                                              |
| <b>Flavones</b>                    |             |                             |                               |                               |                                              |
| Apigenin                           | 12.51       | 269                         | 269,225,149,201,151,226,227   | (269)269,225,149,181          |                                              |
| Vitexin                            | 8.88        | 431                         | 311,341                       |                               | Vitexin                                      |
| Apigenin-C-hexoside                | 9.07        | 431                         | 311,341,413                   |                               | Vitexin                                      |
| Luteolin-C-hexoside                | 8.58        | 447                         | 327,357,429,285               | (327)299,284,327,283          | Vitexin                                      |
| Apigenin-C-hexoside-C-pentoside I  | 8.46        | 563                         | 443,473,545,503,353,383       |                               | Vitexin                                      |
| Apigenin-C-hexoside-C-pentoside II | 8.51        | 563                         | 443,473,545,503,353,383       |                               | Vitexin                                      |
| Apigenin-O-rutinoside              | 7.96        | 577                         | 269,283,225,311               |                               | Rutin                                        |
| Apigenin-O-rhamnoside-C-hexoside   | 9.02        | 577                         | 413,293,457,341               |                               | Vitexin                                      |

|                                       |       |       |                                         |                                  |                         |
|---------------------------------------|-------|-------|-----------------------------------------|----------------------------------|-------------------------|
| Luteolin-C-hexoside-O-rhamnoside      | 8.54  | 593   | <b>473</b> ,429,285,357,339,309,284,327 |                                  | Vitexin                 |
| Methyluteolin-O-rhamnoside-C-hexoside | 9.21  | 607   | <b>443</b> ,323,353,487                 |                                  | Vitexin                 |
| <b>Flavonols</b>                      |       |       |                                         |                                  |                         |
| Quercetin-O-hexoside                  | 9.28  | 463   | <b>301</b> ,300,302                     | (301)179,151,273,257,283         | Rutin                   |
| Taxifolin-O-hexoside                  | 5.69  | 465   | <b>303</b> ,285                         | (303)285,177,125,259             |                         |
| Kaempferol-O-acetylhexoside           | 10.22 | 489   | <b>285</b> ,327                         | (285)257,267,241,229,163,199,213 | Rutin                   |
| Quercetin-O-acetylhexoside I          | 9.40  | 505   | <b>301</b> ,300,463                     | (301)179,151,257,229             | Rutin                   |
| Quercetin-O-acetylhexoside II         | 9.58  | 505   | <b>301</b> ,300,463                     | (301)179,151,257,229             | Rutin                   |
| Kaempferol-O-rutinoside               | 9.66  | 593   | <b>285</b> ,286,257                     | (285)257,267,229,241,213         | Rutin                   |
| Quercetin-3-O-rutinoside              | 9.1   | 609   | <b>301</b> ,299,343                     | (301)179,151,257,273             | Rutin                   |
| <b>Anthocyanins</b>                   |       |       |                                         |                                  |                         |
| Cyanidin-3-O-glucoside                | 6.95  | 449*  | <b>287</b> ,286                         | (287)287,213,231,241,259,189     | Cyanidin-3-O-glucoside  |
| Cyanidin-O-malonylglucoside           | 8.86  | 535*  | <b>287</b> ,535,491,449                 | (287)287,213,259,241,231,269,189 | Cyanidin-3-O-glucoside  |
| Cyanidin-3-O-rutinoside               | 7.41  | 595*  | <b>595</b> ,287,449                     | (595)287,449                     | Cyanidin-3-O-rutinoside |
| Cyanidin-O-dihexoside                 | 5.57  | 611*  | <b>611</b>                              | (611)449,287                     | Cyanidin-3-O-glucoside  |
| (epi)catechin-cyanidin-rutinoside     | 6.33  | 883*  | <b>883</b>                              | (883)575,423,737,329,557         | Cyanidin-3-O-rutinoside |
| Cyanidin-O-rutinoside dimer I         | 6.63  | 1189* | <b>1189</b>                             | (1189)881,1043,735,573           | Cyanidin-3-O-rutinoside |
| Cyanidin-O-rutinoside dimer II        | 7.57  | 1189* | <b>1189</b>                             | (1189)881,1043,735,573           | Cyanidin-3-O-rutinoside |
| Cyanidin-O-rutinoside dimer III       | 8.34  | 1189* | <b>1189</b>                             | (1189)881,1043,735,573           | Cyanidin-3-O-rutinoside |

\*Anthocyanins analysed in ESI+ [M]<sup>+</sup>. \*\* Formate adduct. Product ions are listed in their order of relative ionic abundance and the highest fragment ion is reported in bold type.

**Figure S1.** Chromatographic profiles of caffeoylquinic acids and their MS/MS spectra.

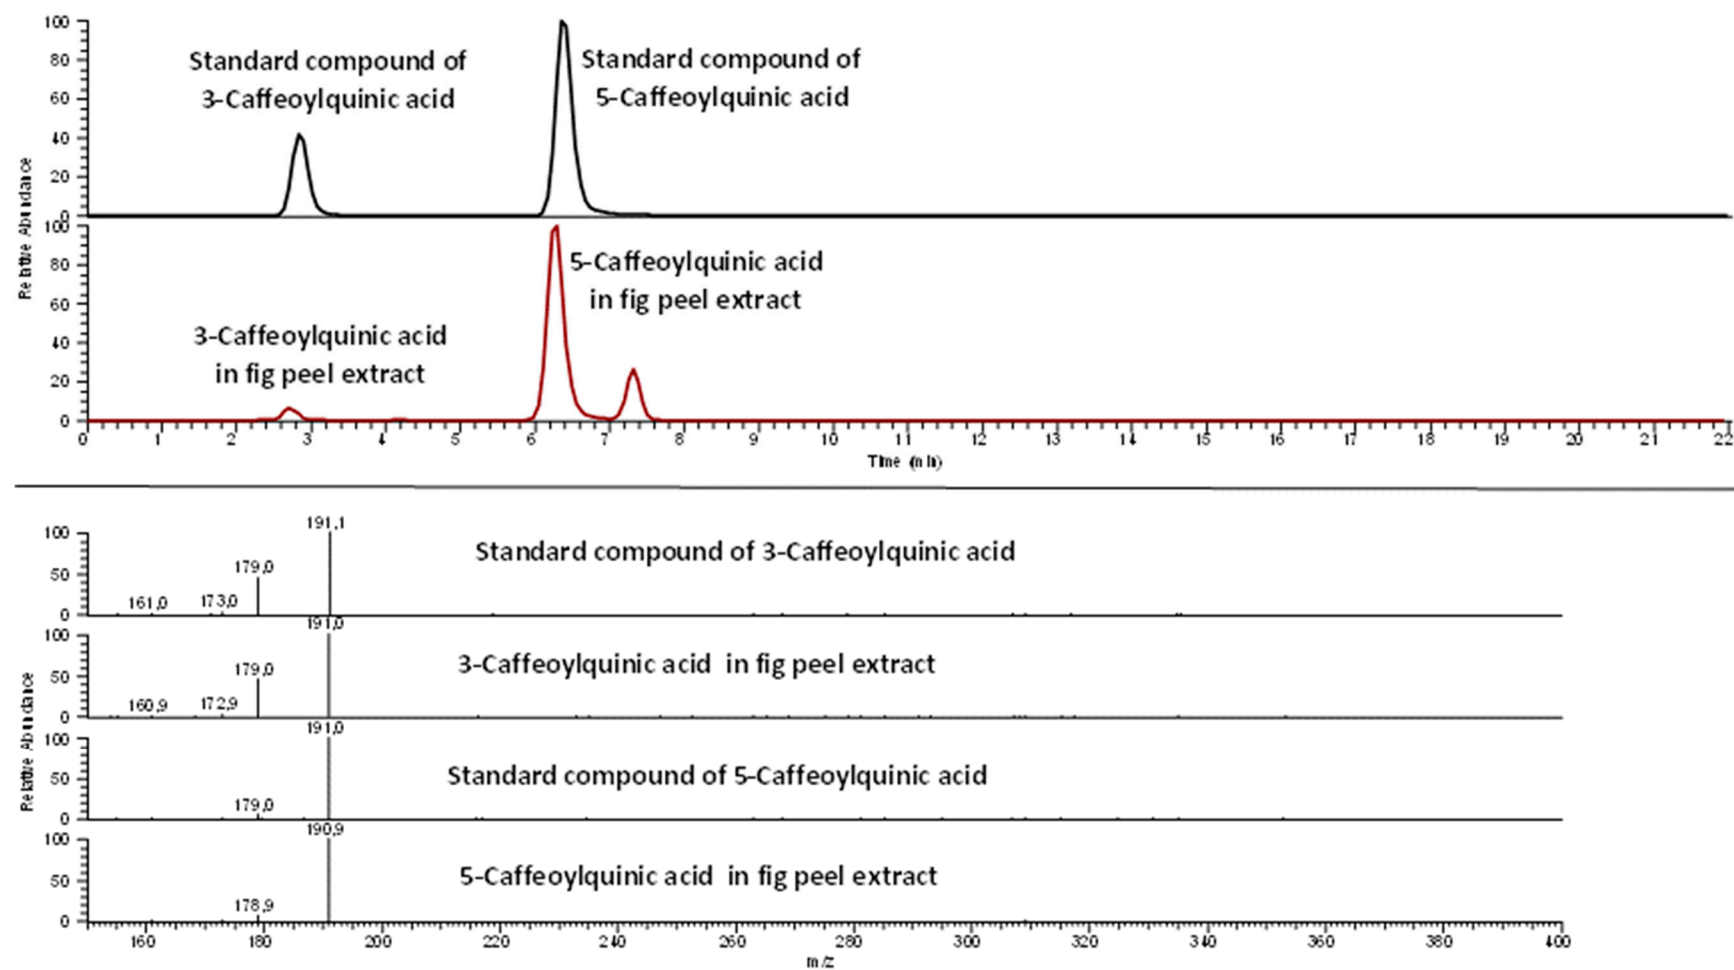

**Figure S2.** Chromatographic profile of quercetin-3-O-rutinoside and its MS/MS spectra.

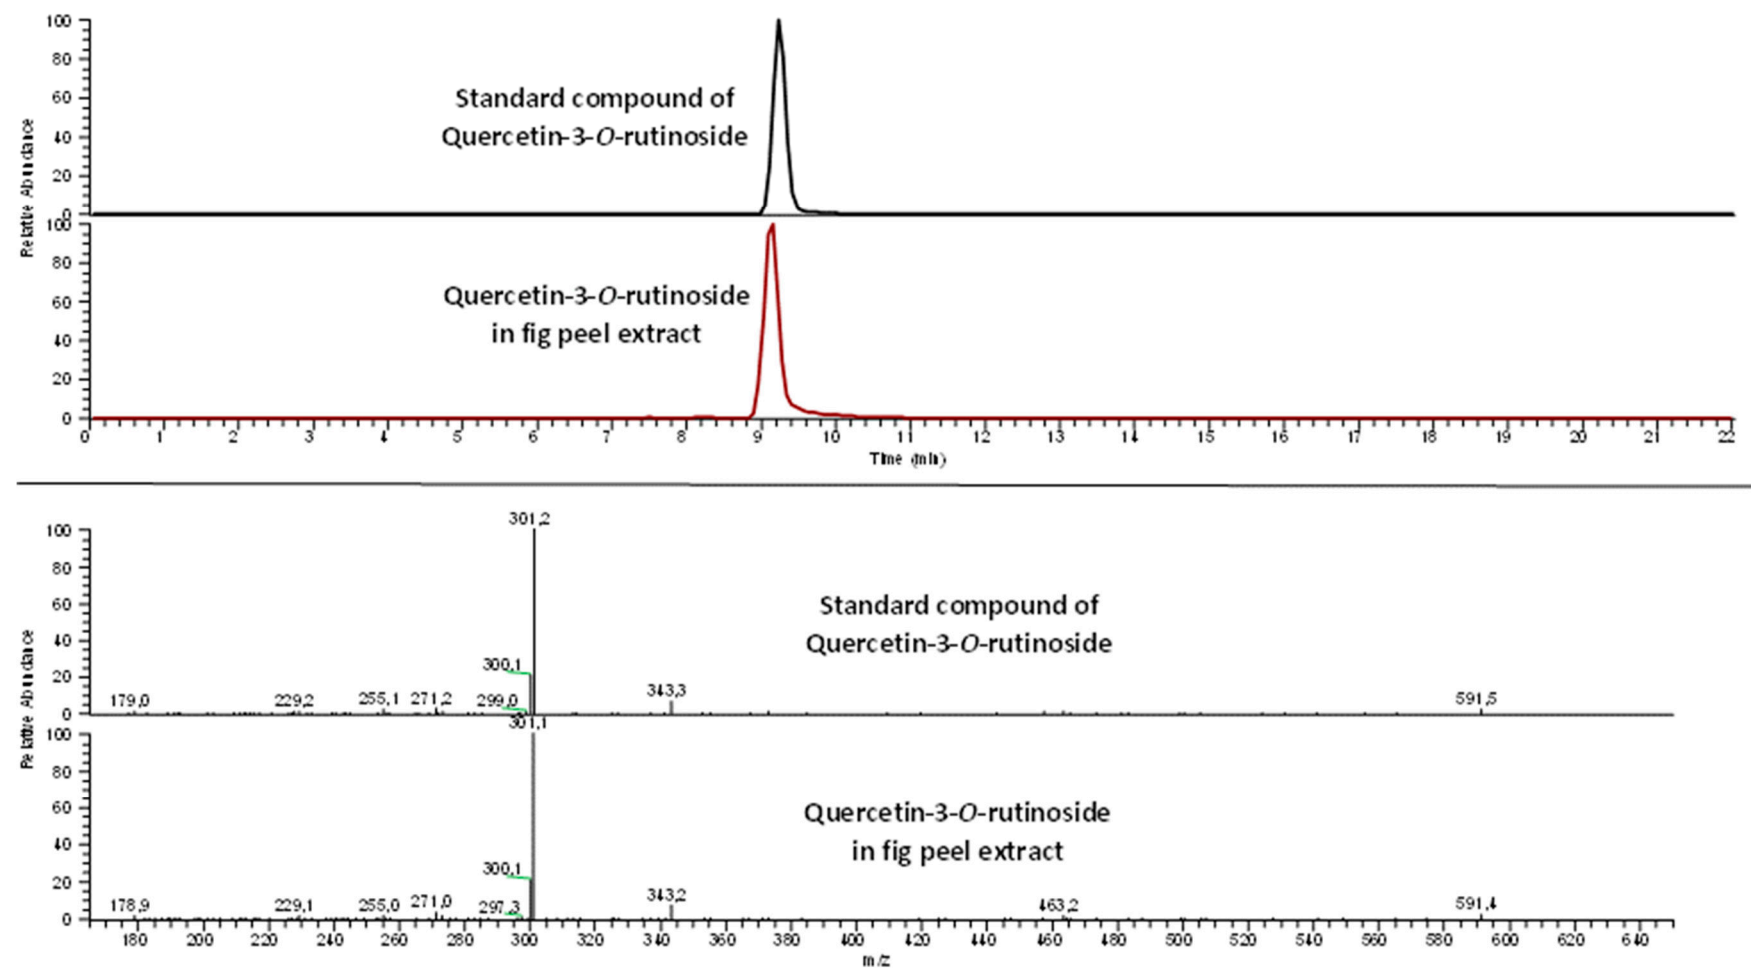

**Figure S3.** Chromatographic profiles of cyanidin-3-*O*-glucoside and cyanidin-3-*O*-rutinoside with their MS/MS spectra.

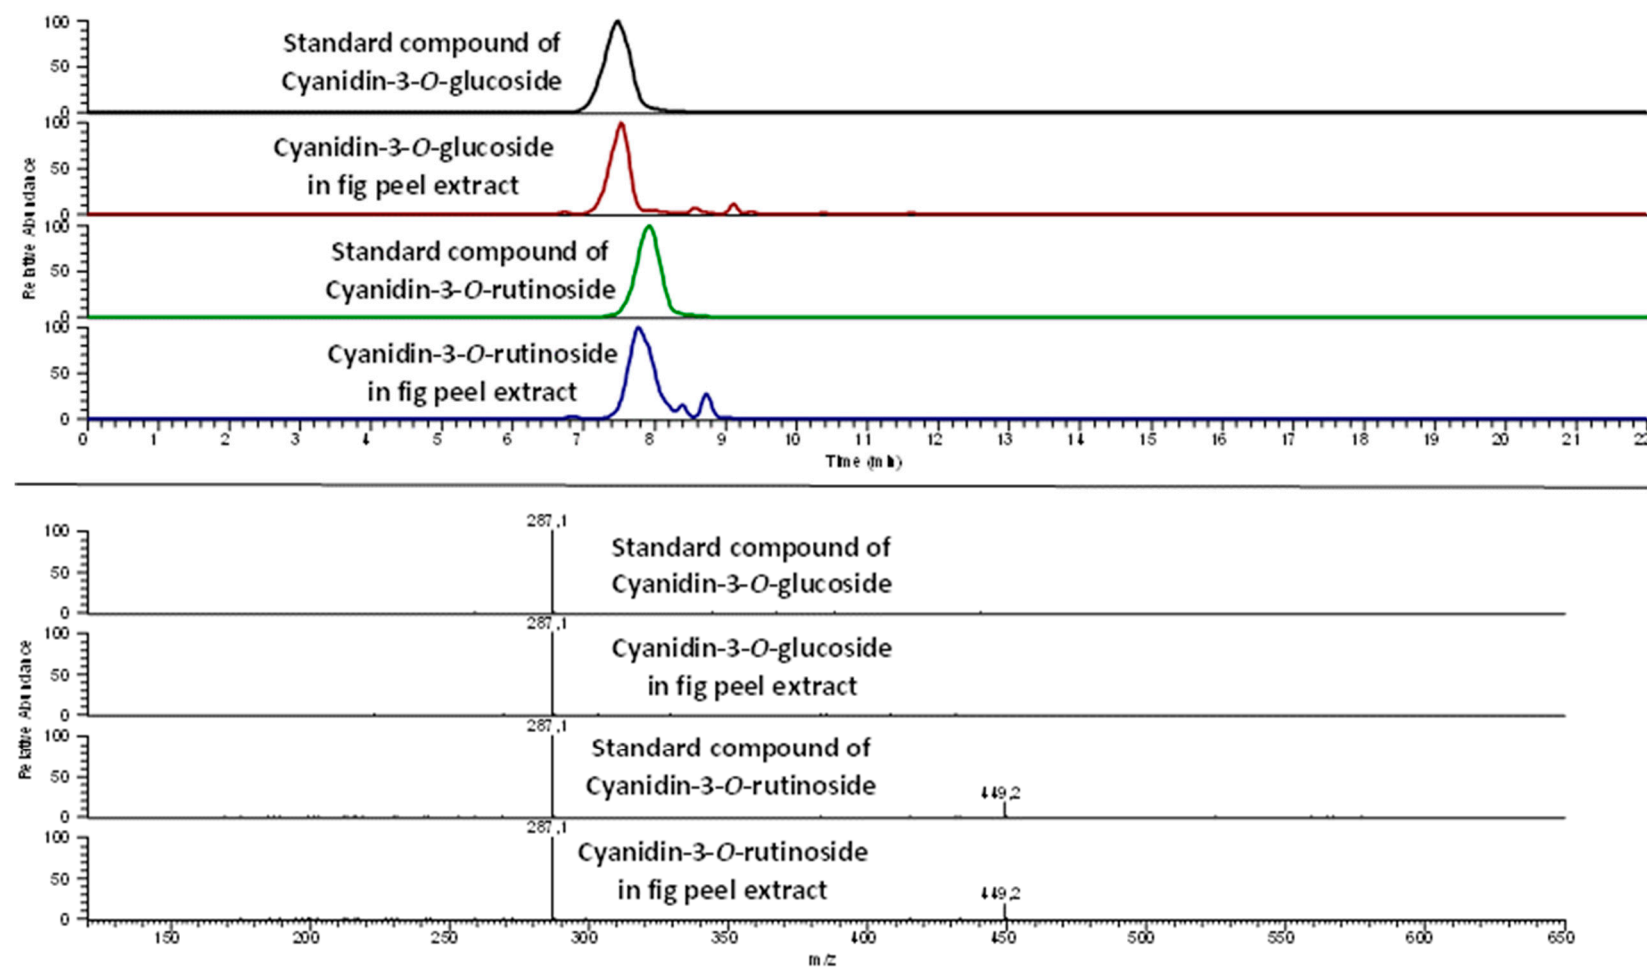

Supplement: s1 [file s1]
